# Supplementary material for: Tattoos as a risk factor for malignant lymphoma: a population-based case–control study
Source: PubMed Central journal article supplement (PMC11141277; doi:10.1016/j.eclinm.2024.102649), 2024-05-21
Supplement: mmc1.pdf [file mmc1.pdf]

## Supplementary

### Table of contents

|                                                                                                                                                                                                  |   |
|--------------------------------------------------------------------------------------------------------------------------------------------------------------------------------------------------|---|
| Figure S1. The directed acyclic graph used to visualize the underlying associations between variables related to tattoo exposure and/or malignant lymphoma during the design phase of the study. | 2 |
| Figure S2. The directed acyclic graph used to inform the statistical analyses.                                                                                                                   | 3 |
| Table S1. Occupations with potential exposure to chemicals with sufficient or limited evidence for lymphoma according to the International Agency for Research on Cancer's classification.       | 4 |
| Table S2. Descriptive drop-out analysis of the 5,591 responders and the 5,983 non-responders at the time of the survey stratified on outcome status.                                             | 5 |
| Table S3. Subgroup analyses of the association between a) tattoo exposure status, and b) tattoo exposure duration, and malignant lymphoma subtypes.                                              | 6 |
| References                                                                                                                                                                                       | 7 |

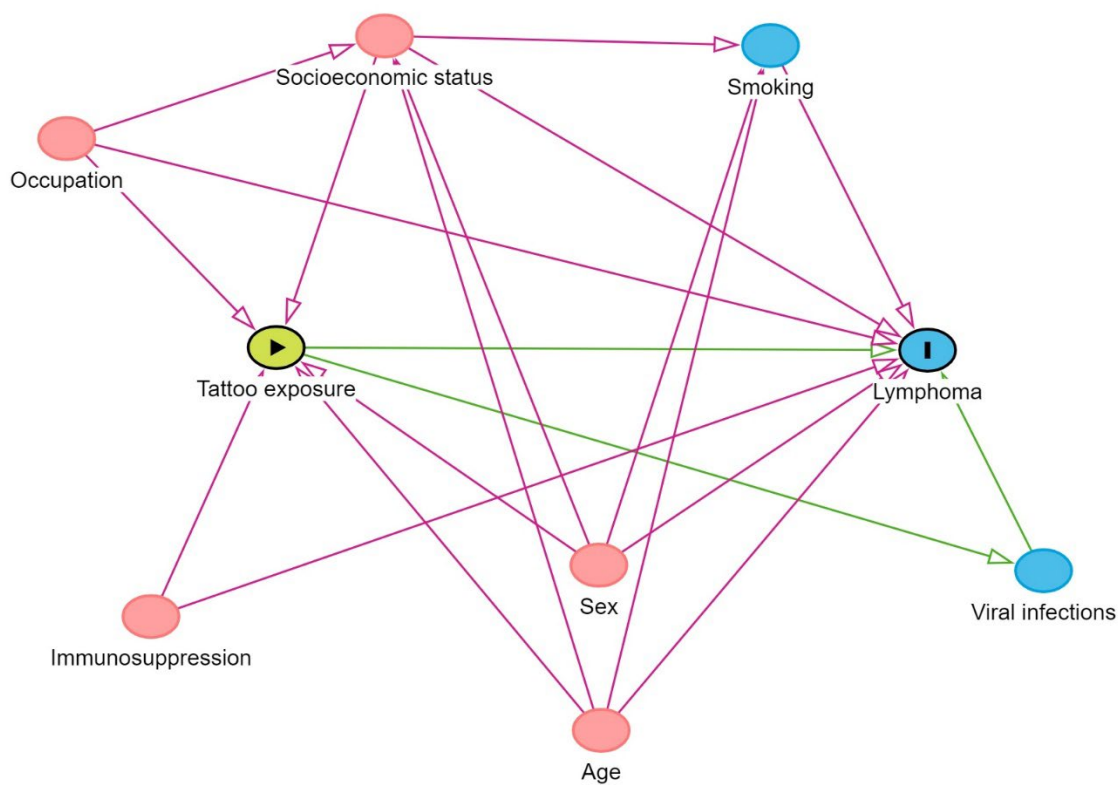

Figure S1. The directed acyclic graph used to visualize the underlying associations between variables related to tattoo exposure and/or malignant lymphoma in the design phase. <sup>1</sup> We used register data on educational attainment, household disposable income, and marital status as proxy variables for socioeconomic status. Viral infections constitute a mediator that should not be adjusted for.

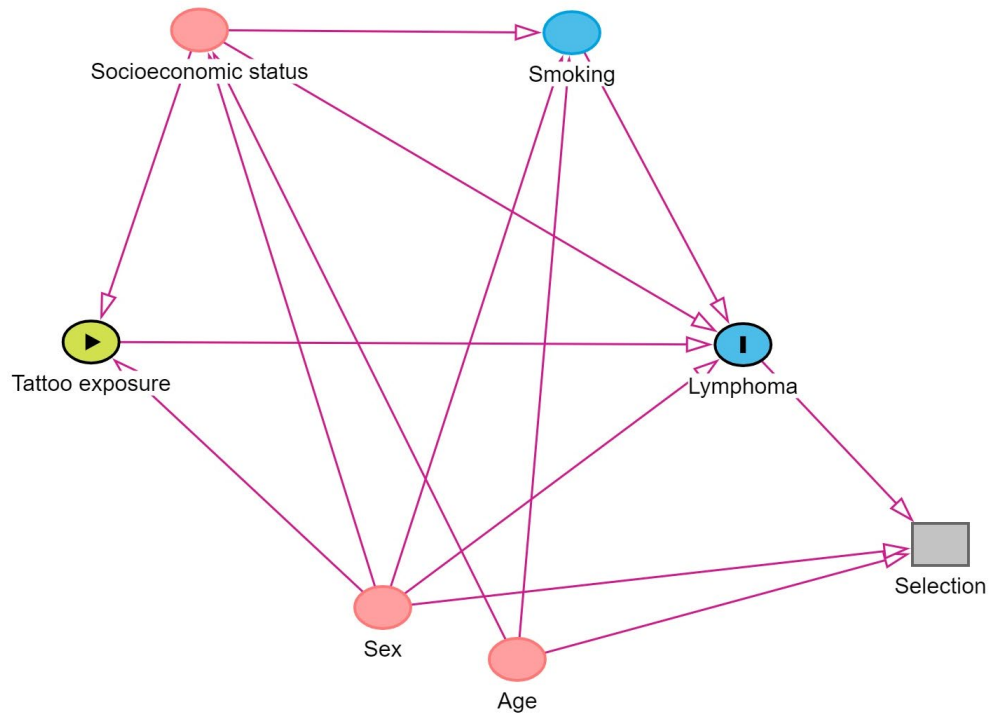

Figure S2. The directed acyclic graph after case-control matching on age and sex. The green arrow represents the association under study. To correctly account for both confounding and the selection bias introduced by the matching, models should adjust for age, sex, socioeconomic status, and smoking. <sup>2</sup>

Table S1. Occupations with potential exposure to chemicals with sufficient or limited evidence for lymphoma according to the International Agency for Research on Cancer's classification. <sup>3</sup>

|                                                  | SSYK <sup>1</sup> 2012 | SSYK 96                            |
|--------------------------------------------------|------------------------|------------------------------------|
| Field crop and vegetable growers                 | 6111                   | 1311, 6111                         |
| Gardeners, cultivation                           | 6112                   | 1311, 6112                         |
| Berry pickers and planters                       | 9210                   | 9210                               |
| Wood treaters                                    | 7521                   | 7421                               |
| Machine operators, rubber products               | 8141                   | 8231                               |
| Machine operators, plastic products              | 8142                   | 8232                               |
| Machine operators, wood treaters                 | 8174                   | 8240                               |
| Chemical processing plant controllers            | 8192                   | 8150                               |
| Metal-, rubber-, and plastic-products assemblers | 8213                   | 8283, 8290                         |
| Firefighters                                     | 5411                   | 5151                               |
| Hairdressers                                     | 5141                   | 5141, 5142, 5143, 5144, 5149, 5419 |

<sup>1</sup>SSYK = Swedish Standard Classification of Occupations.

Table S2. Descriptive drop-out analysis of the 5591 participants and the 5983 nonparticipants at the time of the survey.

|                             | Cases<br>(n=2607)        |                  |                             |     | Controls<br>(n=8967)     |     |                             |     |
|-----------------------------|--------------------------|------------------|-----------------------------|-----|--------------------------|-----|-----------------------------|-----|
|                             | Participants<br>(n=1398) |                  | Nonparticipants<br>(n=1209) |     | Participants<br>(n=4193) |     | Nonparticipants<br>(n=4774) |     |
|                             | n                        | (%) <sup>1</sup> | n                           | (%) | n                        | (%) | n                           | (%) |
| Sex                         |                          |                  |                             |     |                          |     |                             |     |
| Male                        | 772                      | 55               | 724                         | 60  | 2226                     | 53  | 2982                        | 63  |
| Female                      | 626                      | 45               | 485                         | 40  | 1967                     | 47  | 1792                        | 38  |
| Age                         |                          |                  |                             |     |                          |     |                             |     |
| 20-29                       | 39                       | 3                | 78                          | 7   | 97                       | 2   | 273                         | 6   |
| 30-39                       | 142                      | 10               | 213                         | 18  | 384                      | 9   | 738                         | 16  |
| 40-49                       | 240                      | 17               | 244                         | 20  | 566                      | 14  | 1012                        | 21  |
| 50-59                       | 421                      | 30               | 366                         | 30  | 1284                     | 31  | 1385                        | 29  |
| 60-69                       | 554                      | 40               | 308                         | 26  | 1859                     | 44  | 1363                        | 29  |
| 70-79                       | 2                        | 0.1              | -                           | -   | 3                        | 0.1 | 3                           | 0.1 |
| Educational attainment      |                          |                  |                             |     |                          |     |                             |     |
| Primary and lower secondary | 126                      | 9                | 207                         | 17  | 366                      | 9   | 758                         | 16  |
| Upper secondary             | 596                      | 43               | 617                         | 51  | 1826                     | 44  | 2433                        | 51  |
| Post-secondary              | 673                      | 48               | 377                         | 31  | 1996                     | 48  | 1512                        | 32  |
| Missing                     | 2                        | 0.1              | 8                           | 0.8 | 3                        | 0.1 | 67                          | 1   |
| Country of birth            |                          |                  |                             |     |                          |     |                             |     |
| Sweden                      | 1189                     | 85               | 830                         | 69  | 3680                     | 88  | 3500                        | 73  |
| Other                       | 209                      | 15               | 379                         | 31  | 513                      | 12  | 1274                        | 27  |
| Citizenship                 |                          |                  |                             |     |                          |     |                             |     |
| Swedish                     | 1364                     | 98               | 1118                        | 93  | 4095                     | 98  | 4420                        | 93  |
| Other                       | 34                       | 2                | 91                          | 8   | 98                       | 2   | 354                         | 7   |
| Marital status              |                          |                  |                             |     |                          |     |                             |     |
| Married                     | 755                      | 54               | 495                         | 41  | 2300                     | 55  | 2014                        | 42  |
| Unmarried                   | 428                      | 31               | 474                         | 39  | 1237                     | 30  | 1872                        | 39  |
| Divorced                    | 197                      | 14               | 232                         | 19  | 594                      | 14  | 816                         | 17  |
| Widowed                     | 18                       | 1                | 8                           | 1   | 62                       | 2   | 72                          | 2   |
| Disposable income (SEK)     |                          |                  |                             |     |                          |     |                             |     |
| None (0)                    | 26                       | 2                | 83                          | 7   | 69                       | 2   | 247                         | 5   |
| 1 – 124,999                 | 98                       | 7                | 136                         | 11  | 213                      | 5   | 471                         | 10  |
| 125,000 – 199,999           | 94                       | 7                | 123                         | 10  | 271                      | 7   | 426                         | 9   |
| 200,000 – 279,999           | 163                      | 12               | 165                         | 14  | 462                      | 11  | 615                         | 13  |
| 280,000 – 369,999           | 305                      | 22               | 275                         | 23  | 849                      | 20  | 1122                        | 24  |
| ≥370,000                    | 712                      | 51               | 427                         | 35  | 2329                     | 56  | 1893                        | 40  |

<sup>1</sup>Percentages not summing to 100 are caused by rounding.

Table S3. Exploratory subgroup analyses of the association between a) tattoo exposure status, and b) tattoo exposure duration, and malignant lymphoma subtypes.

|                                | Exposure status | Cases<br>(n) | Controls<br>(n) | Adjusted IRR <sup>1</sup><br>(95 % CI) | p-value | Exposure duration<br>(years) | Cases<br>(n) | Controls<br>(n) | Adjusted IRR<br>(95 % CI) | p-value |
|--------------------------------|-----------------|--------------|-----------------|----------------------------------------|---------|------------------------------|--------------|-----------------|---------------------------|---------|
| Hodgkin                        | Tattooed        | 77           | 733             | 1.04 (0.77-1.41)                       | 0.80    | 0-2                          | 15           | 50              | 2.29 (1.19-4.39)          | 0.058   |
|                                |                 |              |                 |                                        |         | 3-10                         | 25           | 183             | 0.82 (0.50-1.33)          |         |
|                                |                 |              |                 |                                        |         | ≥11                          | 37           | 500             | 1.00 (0.67-1.48)          |         |
|                                | Nontattooed     | 212          | 3427            | 1.00                                   |         | Nontattooed                  | 212          | 3427            | 1.00                      |         |
| Follicular                     | Tattooed        | 49           | 733             | 1.29 (0.92-1.82)                       | 0.14    | 0-2                          | 3            | 50              | 1.40 (0.42-4.63)          | 0.48    |
|                                |                 |              |                 |                                        |         | 3-10                         | 7            | 183             | 1.08 (0.49-2.39)          |         |
|                                |                 |              |                 |                                        |         | ≥11                          | 39           | 500             | 1.33 (0.92-1.93)          |         |
|                                | Nontattooed     | 199          | 3427            | 1.00                                   |         | Nontattooed                  | 199          | 3427            | 1.00                      |         |
| Diffuse large B-cell           | Tattooed        | 82           | 733             | 1.30 (0.99-1.71)                       | 0.057   | 0-2                          | 2            | 50              | 0.49 (0.12-2.06)          | 0.11    |
|                                |                 |              |                 |                                        |         | 3-10                         | 18           | 183             | 1.32 (0.78-2.23)          |         |
|                                |                 |              |                 |                                        |         | ≥11                          | 62           | 500             | 1.37 (1.01-1.86)          |         |
|                                | Nontattooed     | 307          | 3427            | 1.00                                   |         | Nontattooed                  | 307          | 3427            | 1.00                      |         |
| Non-follicular indolent B-cell | Tattooed        | 25           | 733             | 1.19 (0.74-1.89)                       | 0.47    | 0-2                          | 6            | 50              | 4.28 (1.70-10.77)         | 0.021   |
|                                |                 |              |                 |                                        |         | 3-10                         | 4            | 183             | 1.03 (0.36-2.95)          |         |
|                                |                 |              |                 |                                        |         | ≥11                          | 15           | 500             | 0.95 (0.54-1.68)          |         |
|                                | Nontattooed     | 109          | 3427            | 1.00                                   |         | Nontattooed                  | 109          | 3427            | 1.00                      |         |
| Marginal zone only             | Tattooed        | 17           | 733             | 1.06 (0.60-1.86)                       | 0.85    | 0-2                          | 4            | 50              | 3.56 (1.18-10.74)         | 0.13    |
|                                |                 |              |                 |                                        |         | 3-10                         | 3            | 183             | 0.95 (0.28-3.21)          |         |
|                                |                 |              |                 |                                        |         | ≥11                          | 10           | 500             | 0.85 (0.43-1.70)          |         |
|                                | Nontattooed     | 73           | 3427            | 1.00                                   |         | Nontattooed                  | 73           | 3427            | 1.00                      |         |
| Aggressive T-cell              | Tattooed        | 10           | 733             | 1.04 (0.50-2.13)                       | 0.93    | 0-2                          | 2            | 50              | 3.02 (0.67-13.64)         | 0.37    |
|                                |                 |              |                 |                                        |         | 3-10                         | 1            | 183             | 0.39 (0.05-2.96)          |         |
|                                |                 |              |                 |                                        |         | ≥11                          | 7            | 500             | 1.08 (0.47-2.49)          |         |
|                                | Nontattooed     | 51           | 3427            | 1.00                                   |         | Nontattooed                  | 51           | 3427            | 1.00                      |         |
| Mantle cell                    | Tattooed        | 8            | 733             | 0.93 (0.43-2.03)                       | 0.86    | 0-2                          | 1            | 50              | 2.16 (0.28-16.69)         | 0.75    |
|                                |                 |              |                 |                                        |         | 3-10                         | 2            | 183             | 1.41 (0.33-6.05)          |         |
|                                |                 |              |                 |                                        |         | ≥11                          | 5            | 500             | 0.74 (0.29-1.92)          |         |
|                                | Nontattooed     | 53           | 3427            | 1.00                                   |         | Nontattooed                  | 53           | 3427            | 1.00                      |         |
| Other                          | Tattooed        | 38           | 733             | 1.21 (0.82-1.77)                       | 0.34    | 0-2                          | 4            | 50              | 1.92 (0.67-5.49)          | 0.43    |
|                                |                 |              |                 |                                        |         | 3-10                         | 11           | 183             | 1.51 (0.78-2.94)          |         |
|                                |                 |              |                 |                                        |         | ≥11                          | 23           | 500             | 1.04 (0.65-1.66)          |         |
|                                | Nontattooed     | 159          | 3427            | 1.00                                   |         | Nontattooed                  | 159          | 3427            | 1.00                      |         |

All estimates were obtained from unconditional logistic regression adjusted for age, sex, index year, educational attainment, household disposable income, marital status, and smoking. There were too few observations to allow for matched analyses.

<sup>1</sup>Incidence rate ratio.

## References

1. Textor J, van der Zander B, Gilthorpe MS, Liškiewicz M, Ellison GT. Robust causal inference using directed acyclic graphs: the R package ‘dagitty’. *Int J Epidemiol* 2017; 45(6): 1887-94.
2. Shrier I, Stovitz SD, Textor J. Identifiability of causal effects in test-negative design studies. *Int J Epidemiol* 2023; 52(6): 1968-74.
3. World Health Organization, International Agency for Research on Cancer. List of classifications by cancer sites with *sufficient* or *limited evidence* in humans. 2023: IARC Monographs. [https://monographs.iarc.who.int/wp-content/uploads/2019/07/Classifications\\_by\\_cancer\\_site.pdf](https://monographs.iarc.who.int/wp-content/uploads/2019/07/Classifications_by_cancer_site.pdf). Accessed 2024-03-10
